# Supplementary material
Source: publisher figshare collection journal article supplement (https://acs.figshare.com/ndownloader/files/8000047)

# **Malonylome Analysis Reveals the Involvement of Lysine Malonylation in Metabolism and Photosynthesis in Cyanobacteria**

Yanyan Ma<sup>1,2#</sup>, Mingkun Yang<sup>1#</sup>, Xiaohuang Lin<sup>1,2</sup>, Xin Liu<sup>1,2</sup>, Hui Huang<sup>1,2</sup>, Feng Ge<sup>1\*</sup>

<sup>1</sup> Key Laboratory of Algal Biology, Institute of Hydrobiology, Chinese Academy of Sciences, Wuhan 430072, China

<sup>2</sup> University of Chinese Academy of Sciences, Beijing 100049, China

<sup>#</sup> These authors contributed equally to this work.

<sup>\*</sup>To whom correspondence should be addressed: Prof. Feng Ge, Institute of Hydrobiology, Chinese Academy of Sciences, E-mail: gefeng@ihb.ac.cn. Phone/Fax: +86-27-68780500.

Table S1: Details of the identified malonylated peptides in *Synechocystis*.

Table S2: List of *Synechocystis* malonylome and other bacterial malonylomes.

Table S3: GO classification of malonylated proteins in *Synechocystis*.

Table S4: GO and pathway enrichment analysis of identified malonylated proteins in *Synechocystis*.

Table S5: Comparison of lysine malonylation sites in *Synechocystis* with those in other two organisms.

Table S6: List of malonylated proteins and the interacting proteins.

Table S7: List of KEGG pathways represented by the identified malonylated proteins.

Table S8: Comparison of lysine malonylome with acetylome in *Synechocystis*.

Table S9: List of KEGG pathways represented by the acetylated and malonylated proteins in *Synechocystis*.

Figure S1: Evaluation of the quality of proteomic data. (A) Peptide score and mass error statistics for malonylated peptides. (B) Histogram illustrating the number of malonylation sites identified per protein.

Figure S2: Protein-protein interaction (PPI) network of all identified malonylated proteins.

**Supplemental Figure S1**

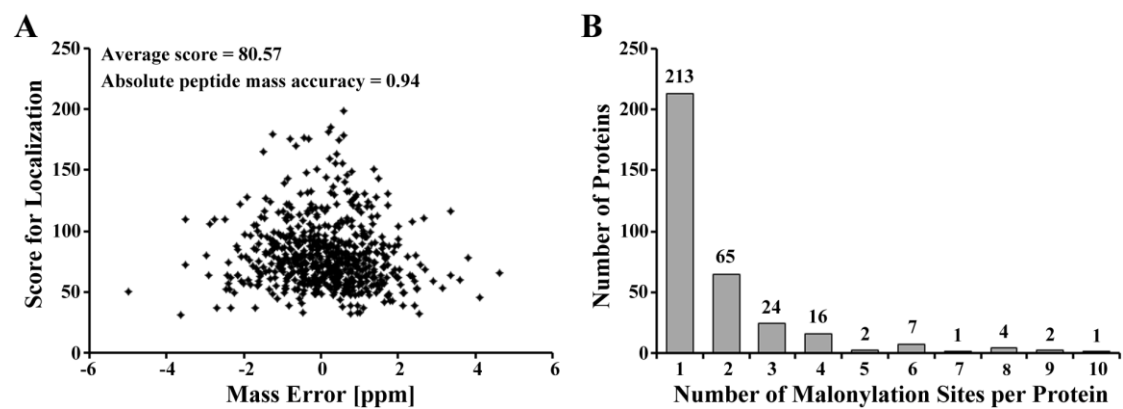

**Supplemental Figure S2**

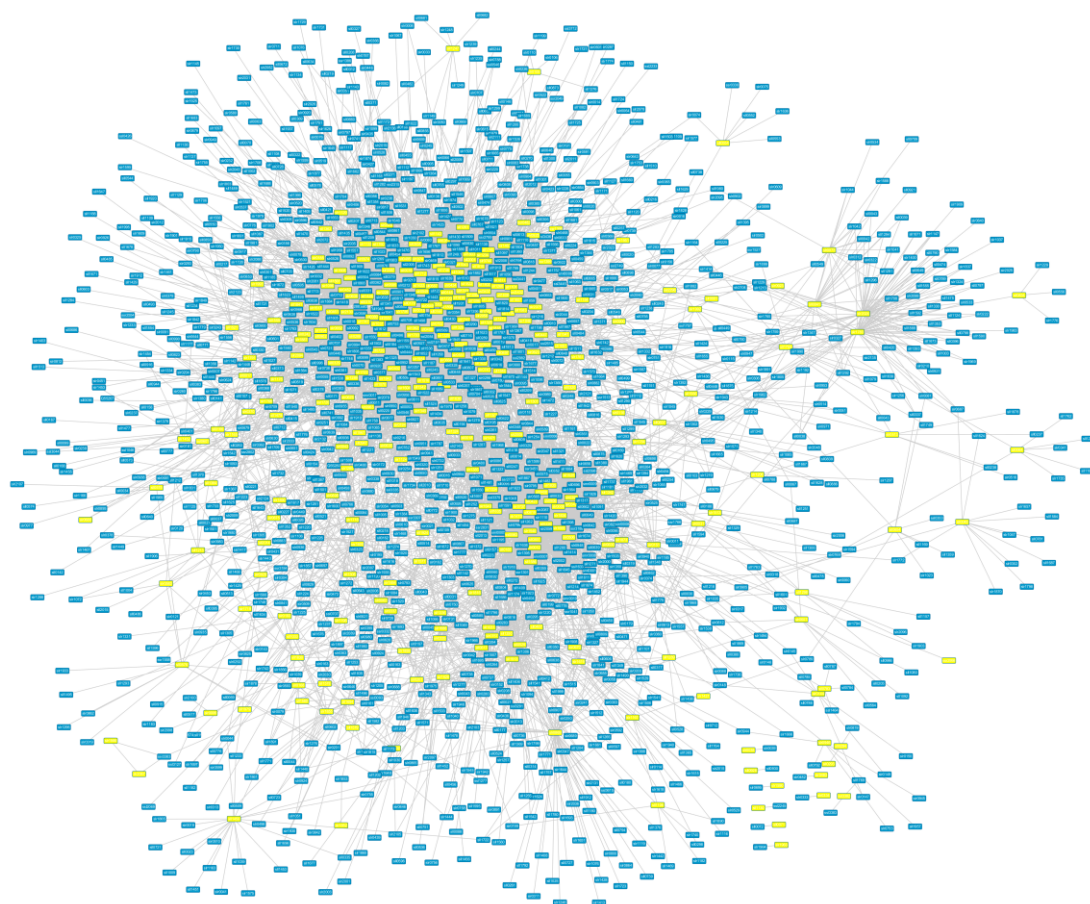

Supplement: Supplementary file 1 [file 8000047]
